# Supplementary material for: Protocol for whole-mount immunofluorescence staining of ECM gel-embedded innervated pancreatic organoids
Source: PubMed Central journal article supplement (PMC11227007; doi:10.1016/j.xpro.2024.103132), 2024-06-13
Supplement: mmc1.pdf [file mmc1.pdf]

Image: **Region 3\_Merged\_Crop001**Size: **166,11 MB**File Location: **C:\Users\erdin\OneDrive\My Articles\Jove\_2022\RAW Jove figures\lasx\11.11.2020\_kpc1510+2d b3 gfap.tif**Start Time: **11.11.2020 15:32:02.107**End Time: **11.11.2020 15:31:43.831**Total Exposures: **44 (4 channels, 11 frames)**Data from: **LAS X 3.5.5.19976**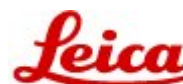

MICROSYSTEMS

Shown Devices: **Active** and  
Inactive ([Toggle](#))**Dimensions**

| Dimension | Logical Size | Physical Length | Start Position | End Position | Pixel Size / Voxel Size |
|-----------|--------------|-----------------|----------------|--------------|-------------------------|
| X         | 1953         | 869.87 µm       | 0 µm           | 869.87 µm    | 0.446 µm                |
| Y         | 1933         | 860.96 µm       | 0 µm           | 860.96 µm    | 0.446 µm                |
| Z         | 11           | 20 µm           | 68 µm          | 87.99 µm     | 2 µm                    |

**Channels**

| LUT                                                                                       | Resolution | Min | Max | STED: DetectorMode / Huygens saturation factor / Wavelength |
|-------------------------------------------------------------------------------------------|------------|-----|-----|-------------------------------------------------------------|
| Blue    | 8          | 0   | 255 | --- / --- / ---                                             |
| Green  | 8          | 0   | 255 | --- / --- / ---                                             |
| Red    | 8          | 0   | 255 | --- / --- / ---                                             |
| Cyan   | 8          | 0   | 255 | --- / --- / ---                                             |

**Time Stamps:**

| Frame ( <a href="#">Show All</a> ) | Relative Time (s) | Absolute Time (h:m:s.ms) | Date       |
|------------------------------------|-------------------|--------------------------|------------|
| 1                                  | 0,000             | 15:32:02.107             | 11.11.2020 |
| 44                                 | -18,276           | 15:31:43.831             | 11.11.2020 |

**Confocal Settings**

| Name             | Value         |
|------------------|---------------|
| Rotator Angle    | -1.38 °       |
| Scan Mode        | xyz           |
| Scan Direction X | Bidirectional |
| Scan Speed       | 700 Hz        |
| Version Number   | 15            |
| StagePosX        | 50,213.1 µm   |
| StagePosY        | 47,345.75 µm  |
| ZPosition        | 8.77 µm       |
| IsSuperZ         | 0             |
| Magnification    | 20            |

|                                                |                            |
|------------------------------------------------|----------------------------|
| ObjectiveName                                  | HC PL APO CS2 20x/0.75 IMM |
| Immersion                                      | IMM                        |
| Numerical Aperture                             | 0.75                       |
| RefractionIndex                                | 1.518                      |
| Zoom                                           | 1.28                       |
| Pinhole                                        | 56.6 $\mu$ m               |
| PinholeAiry                                    | 999.82 mAU                 |
| EmissionWavelength for PinholeAiry Calculation | 580 nm                     |
| FrameAverage                                   | 1                          |
| LineAverage                                    | 1                          |
| FrameAccumulation                              | 1                          |
| Line_Accumulation                              | 1                          |
| IsUserSettingNameSet                           | 0                          |
| IsRoiScanEnable                                | 0                          |

### Filter Wheels / Other Motorized Devices

| Device Name     | Filter Name/Position |
|-----------------|----------------------|
| Target Slider   | Target Park          |
| X2 Lens Changer | CS2 UV Optics 2      |

### Lasers

| LaserName | OutputPower   |
|-----------|---------------|
| Diode 405 | On            |
| WLL       | On, 70,0000 % |

### Laser Lines

| Laser Line | Intensity                        |
|------------|----------------------------------|
| ( 405 nm)  | Shutter: on, Intensity: 1.0023%  |
| ( 499 nm)  | Shutter: off, Intensity: 0.0000% |
| ( 598 nm)  | Shutter: off, Intensity: 0.0000% |
| ( 653 nm)  | Shutter: off, Intensity: 0.0000% |
| ( 470 nm)  | Shutter: off, Intensity: 0.0000% |
| ( 471 nm)  | Shutter: off, Intensity: 0.0000% |
| ( 670 nm)  | Shutter: off, Intensity: 0.0000% |
| ( 669 nm)  | Shutter: off, Intensity: 0.0000% |
| ( 668 nm)  | Shutter: off, Intensity: 0.0000% |

### Detectors

| Name  | Channel      | Type                              | Location | Active   | Gain | Offset | Gate Start | Gate End | Gate Ref. Wavelength            |
|-------|--------------|-----------------------------------|----------|----------|------|--------|------------|----------|---------------------------------|
| HyD 1 | Channel 1    | HyD (395nm - 400nm) Standard mode | Internal | Inactive | 100  | --     | --         | --       | -- Time Gating not activated -- |
| PMT 2 | Channel 2    | PMT (400nm - 405nm)               | Internal | Inactive | 0    | 0      | --         | --       | -- Time Gating not supported -- |
| HyD 3 | Channel 3    | HyD (405nm - 410nm) Standard mode | Internal | Inactive | 100  | --     | --         | --       | -- Time Gating not activated -- |
| PMT 4 | Channel 4    | PMT (417nm - 462nm)               | Internal | Active   | 800  | -0.5   | --         | --       | -- Time Gating not supported -- |
|       | Transmission |                                   |          |          |      |        | --         | --       | -- Time Gating not supported -- |

|           |         |     |     |          |       |   |
|-----------|---------|-----|-----|----------|-------|---|
| PMT Trans | Channel | PMT | TLD | Inactive | 235.2 | 0 |
|-----------|---------|-----|-----|----------|-------|---|

**Sequential Setting Nr.1**

|                                                |                                              |
|------------------------------------------------|----------------------------------------------|
| Pinhole                                        | 56.6 µm                                      |
| PinholeAiry                                    | 999.82 mAU                                   |
| EmissionWavelength for PinholeAiry Calculation | 580 nm                                       |
| Target Slider                                  | Target Park                                  |
| X2 Lens Changer                                | CS2 UV Optics 2                              |
| HyD 1 (395nm - 400nm) Standard mode            | Inactive, Gain: 100, Offset: 0               |
| HyD Timegate (-1 nm)                           | Inactive, Gate Start: 0.3 ns, Gate End: 6 ns |
| PMT 2 (400nm - 405nm)                          | Inactive, Gain: 0, Offset: 0                 |
| HyD 3 (405nm - 410nm) Standard mode            | Inactive, Gain: 100, Offset: 0               |
| HyD Timegate (-1 nm)                           | Inactive, Gate Start: 0.3 ns, Gate End: 6 ns |
| PMT 4 (417nm - 462nm)                          | Active, Gain: 800, Offset: 0                 |
| PMT Trans                                      | Inactive, Gain: 235, Offset: 0               |
| Laser Line ( 405 nm)                           | Shutter: on, Intensity: 1.0023%              |
| Laser Line ( 499 nm)                           | Shutter: off, Intensity: 0.0000%             |
| Laser Line ( 598 nm)                           | Shutter: off, Intensity: 0.0000%             |
| Laser Line ( 653 nm)                           | Shutter: off, Intensity: 0.0000%             |
| Laser Line ( 470 nm)                           | Shutter: off, Intensity: 0.0000%             |
| Laser Line ( 471 nm)                           | Shutter: off, Intensity: 0.0000%             |
| Laser Line ( 670 nm)                           | Shutter: off, Intensity: 0.0000%             |
| Laser Line ( 669 nm)                           | Shutter: off, Intensity: 0.0000%             |
| Laser Line ( 668 nm)                           | Shutter: off, Intensity: 0.0000%             |

**Sequential Setting Nr.2**

|                                                |                                              |
|------------------------------------------------|----------------------------------------------|
| Pinhole                                        | 56.6 µm                                      |
| PinholeAiry                                    | 999.82 mAU                                   |
| EmissionWavelength for PinholeAiry Calculation | 580 nm                                       |
| Target Slider                                  | Target Park                                  |
| X2 Lens Changer                                | CS2 UV Optics 2                              |
| HyD 1 (509nm - 530nm) Standard mode            | Active, Gain: 100, Offset: 0                 |
| HyD Timegate (499 nm)                          | Active, Gate Start: 0.3 ns, Gate End: 6 ns   |
| PMT 2 (590nm - 595nm)                          | Inactive, Gain: 0, Offset: 0                 |
| HyD 3 (595nm - 600nm) Standard mode            | Inactive, Gain: 100, Offset: 0               |
| HyD Timegate (-1 nm)                           | Inactive, Gate Start: 0.3 ns, Gate End: 6 ns |
| PMT 4 (600nm - 605nm)                          | Inactive, Gain: 0, Offset: 0                 |
| PMT Trans                                      | Inactive, Gain: 0, Offset: 0                 |
| Laser Line ( 405 nm)                           | Shutter: off, Intensity: 0.0000%             |
| Laser Line ( 499 nm)                           | Shutter: on, Intensity: 3.0012%              |
| Laser Line ( 598 nm)                           | Shutter: on, Intensity: 0.0000%              |
| Laser Line ( 653 nm)                           | Shutter: on, Intensity: 0.0000%              |
| Laser Line ( 471 nm)                           | Shutter: on, Intensity: 0.0000%              |

|                      |                                 |
|----------------------|---------------------------------|
| Laser Line ( 472 nm) | Shutter: on, Intensity: 0.0000% |
| Laser Line ( 668 nm) | Shutter: on, Intensity: 0.0000% |
| Laser Line ( 667 nm) | Shutter: on, Intensity: 0.0000% |
| Laser Line ( 666 nm) | Shutter: on, Intensity: 0.0000% |

**Sequential Setting Nr.3**

|                                                |                                              |
|------------------------------------------------|----------------------------------------------|
| Pinhole                                        | 56.6 $\mu$ m                                 |
| PinholeAiry                                    | 999.82 mAU                                   |
| EmissionWavelength for PinholeAiry Calculation | 580 nm                                       |
| Target Slider                                  | Target Park                                  |
| X2 Lens Changer                                | CS2 UV Optics 2                              |
| HyD 1 (609nm - 630nm) Standard mode            | Active, Gain: 100, Offset: 0                 |
| HyD Timegate (598 nm)                          | Active, Gate Start: 0.3 ns, Gate End: 6 ns   |
| PMT 2 (641nm - 646nm)                          | Inactive, Gain: 0, Offset: 0                 |
| HyD 3 (646nm - 651nm) Standard mode            | Inactive, Gain: 100, Offset: 0               |
| HyD Timegate (-1 nm)                           | Inactive, Gate Start: 0.3 ns, Gate End: 6 ns |
| PMT 4 (651nm - 656nm)                          | Inactive, Gain: 0, Offset: 0                 |
| PMT Trans                                      | Inactive, Gain: 0, Offset: 0                 |
| Laser Line ( 405 nm)                           | Shutter: off, Intensity: 0.0000%             |
| Laser Line ( 499 nm)                           | Shutter: on, Intensity: 0.0000%              |
| Laser Line ( 598 nm)                           | Shutter: on, Intensity: 0.3999%              |
| Laser Line ( 653 nm)                           | Shutter: on, Intensity: 0.0000%              |
| Laser Line ( 472 nm)                           | Shutter: on, Intensity: 0.0000%              |
| Laser Line ( 473 nm)                           | Shutter: on, Intensity: 0.0000%              |
| Laser Line ( 666 nm)                           | Shutter: on, Intensity: 0.0000%              |
| Laser Line ( 665 nm)                           | Shutter: on, Intensity: 0.0000%              |
| Laser Line ( 664 nm)                           | Shutter: on, Intensity: 0.0000%              |

**Sequential Setting Nr.4**

|                                                |                                              |
|------------------------------------------------|----------------------------------------------|
| Pinhole                                        | 56.6 $\mu$ m                                 |
| PinholeAiry                                    | 999.82 mAU                                   |
| EmissionWavelength for PinholeAiry Calculation | 580 nm                                       |
| Target Slider                                  | Target Park                                  |
| X2 Lens Changer                                | CS2 UV Optics 2                              |
| HyD 1 (603nm - 641nm) Standard mode            | Inactive, Gain: 100, Offset: 0               |
| HyD Timegate (-1 nm)                           | Inactive, Gate Start: 0.3 ns, Gate End: 6 ns |
| PMT 2 (641nm - 646nm)                          | Inactive, Gain: 0, Offset: 0                 |
| HyD 3 (661nm - 679nm) Standard mode            | Active, Gain: 100, Offset: 0                 |
| HyD Timegate (653 nm)                          | Active, Gate Start: 0.3 ns, Gate End: 6 ns   |
| PMT 4 (775nm - 780nm)                          | Inactive, Gain: 0, Offset: 0                 |
| PMT Trans                                      | Inactive, Gain: 0, Offset: 0                 |
| Laser Line ( 405 nm)                           | Shutter: off, Intensity: 0.0000%             |
| Laser Line ( 499 nm)                           | Shutter: on, Intensity: 0.0000%              |

|                      |                                 |
|----------------------|---------------------------------|
| Laser Line ( 598 nm) | Shutter: on, Intensity: 0.0000% |
| Laser Line ( 653 nm) | Shutter: on, Intensity: 1.0005% |
| Laser Line ( 473 nm) | Shutter: on, Intensity: 0.0000% |
| Laser Line ( 474 nm) | Shutter: on, Intensity: 0.0000% |
| Laser Line ( 664 nm) | Shutter: on, Intensity: 0.0000% |
| Laser Line ( 663 nm) | Shutter: on, Intensity: 0.0000% |
| Laser Line ( 662 nm) | Shutter: on, Intensity: 0.0000% |
